# Supplementary material for: Tuning protein–protein interactions using cosolvents: specific effects of ionic and non-ionic additives on protein phase behavior
Source: Royal Society of Chemistry journal article supplement (doi:10.1039/c5cp07285a), 2016-01-01
Supplement: c5cp07285a1.pdf [file c5cp07285a1.pdf]

## Tuning protein-protein interactions by cosolvents: specific effects of ionic and non-ionic additives on protein phase behavior

Jan Hansen, Florian Platten, Dana Wagner, Stefan U. Egelhaaf

Condensed Matter Physics Laboratory, Heinrich Heine University, 40225 Düsseldorf, Germany

E-Mail: [Florian.Platten@hhu.de](mailto:Florian.Platten@hhu.de)

### Supporting Information

**Table S1** – List of denaturation temperatures in the absence of cosolvents,  $T_0$ , which were determined in previous studies (as indicated) using differential scanning calorimetry (see Eq. (5) and Fig. 9 of the manuscript).

| cosolvent             | pH  | buffer         | protein concentration | heat rate / K/min | $T_0 / ^\circ\text{C}$ |
|-----------------------|-----|----------------|-----------------------|-------------------|------------------------|
| GuHCl <sup>1</sup>    | 4.6 | acetate        |                       |                   | 79                     |
| glycerol <sup>2</sup> | 4.0 | 0.01 M glycine | 2%                    | 1.4               | 74.8                   |
| DMSO <sup>3</sup>     | 5.0 |                | 50 mg/mL              | 1                 | 73.6                   |

**Figure S1** – Critical temperatures  $T_c$  used in Fig. 10 of the manuscript.

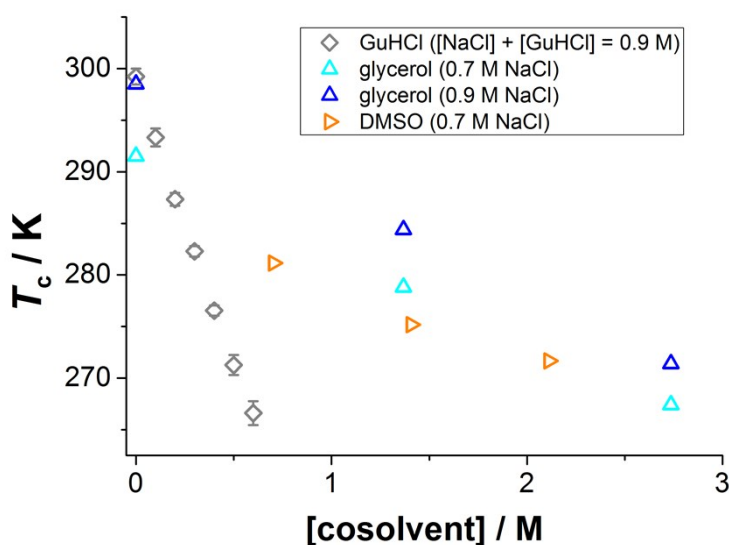

**Figure S2** – In Sear's model,<sup>4</sup> proteins are modeled as hard spheres (large circle) with an even number of conical interaction sites (small circles).

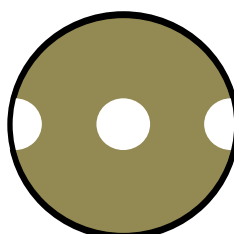

#### References

1. G.I. Makhatadze and P.L. Privalov, *J. Mol. Biol.*, 1992, 226, 491-505.
2. K. Gekko, *J. Biochem.*, 1982, 91, 1197-1204.
3. A. Torreggiani et al., *J. Mol. Struct.*, 2008, 891, 115-122.
4. R.P. Sear, *J. Chem. Phys.*, 1999, 111, 4800-4806.
